# Supplementary material for: Impact of type of full-field digital image on mammographic density assessment and breast cancer risk estimation: a case-control study
Source: Springer Nature journal article supplement (doi:10.1186/s13058-016-0756-7), 2016-09-26

Median (IQR): 6.6 (23.5) cm<sup>2</sup>

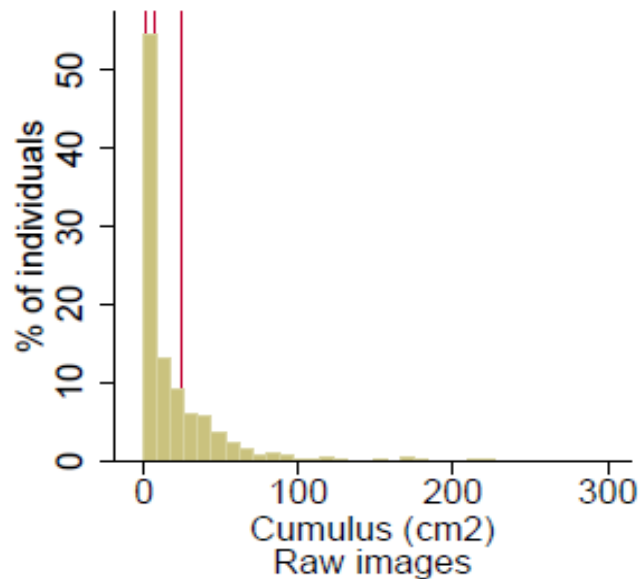

Median (IQR): 7.1 (16.3) cm<sup>2</sup>

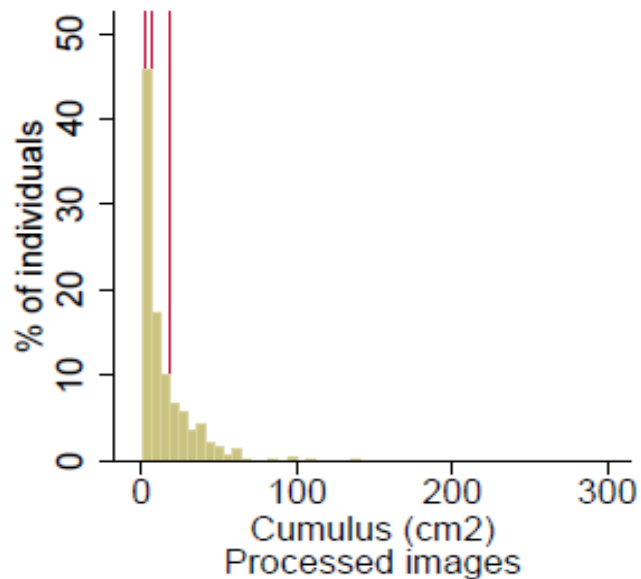

Median (IQR): 11.9 (39.1) cm<sup>2</sup>

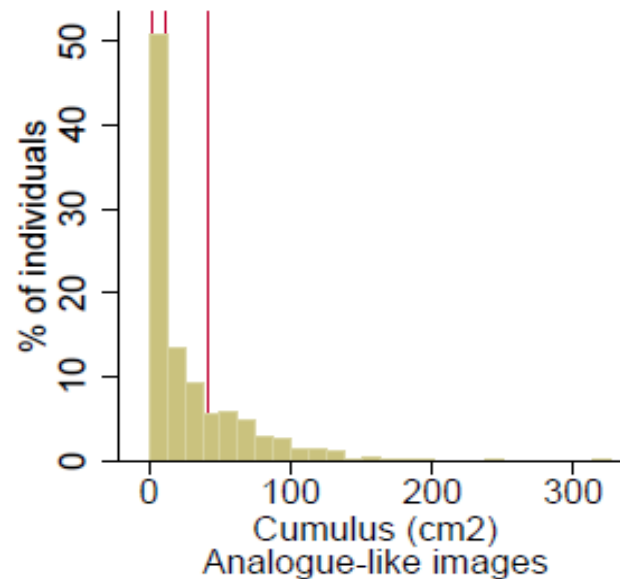

Median (IQR): 18.2 (16.4) cm<sup>2</sup>

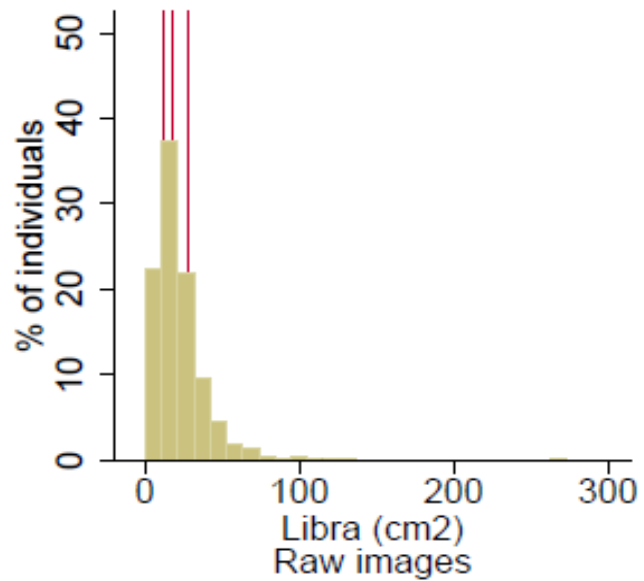

Median (IQR): 12.2 (24.1) cm<sup>2</sup>

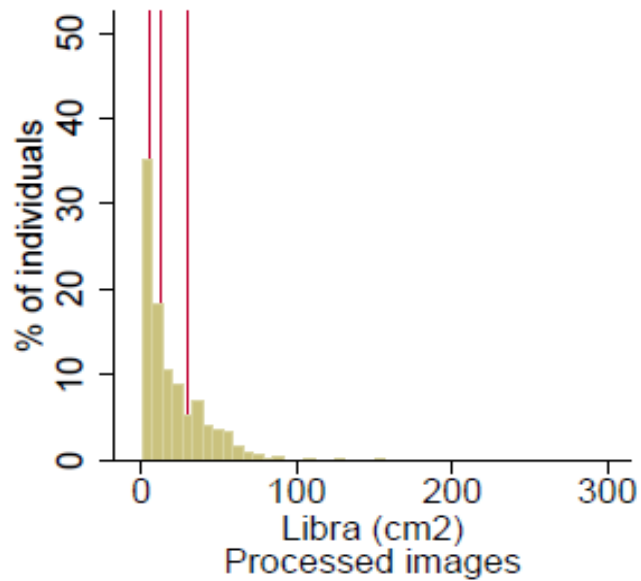

Supplement: MOESM2 [file 10749418]
