# Supplementary material for: Impact of type of full-field digital image on mammographic density assessment and breast cancer risk estimation: a case-control study
Source: Springer Nature journal article supplement (doi:10.1186/s13058-016-0756-7), 2016-09-26

Median (IQR): 128.7 (98.7) cm<sup>2</sup>

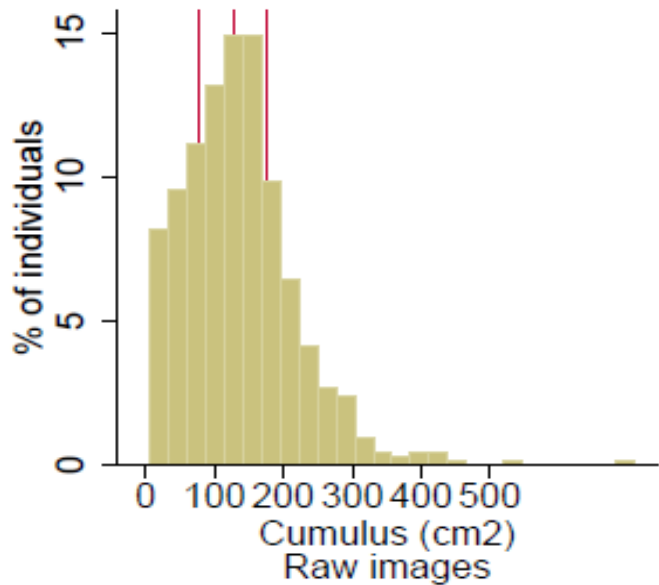

Median (IQR): 131.9 (92.8) cm<sup>2</sup>

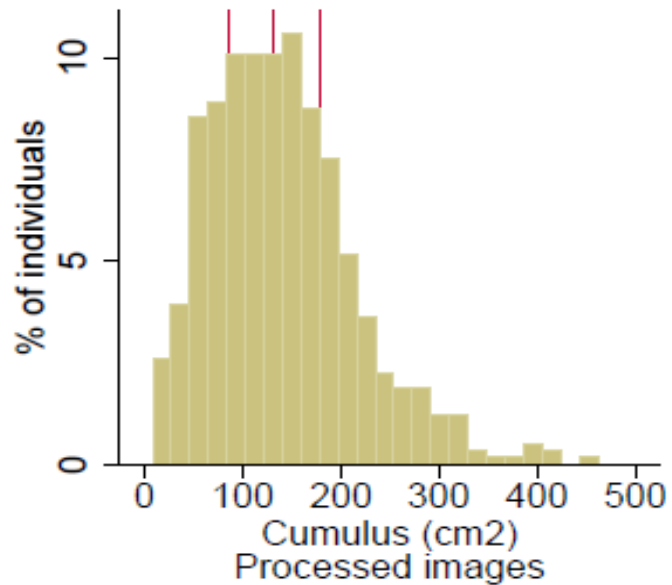

Median (IQR): 113.0 (108.1) cm<sup>2</sup>

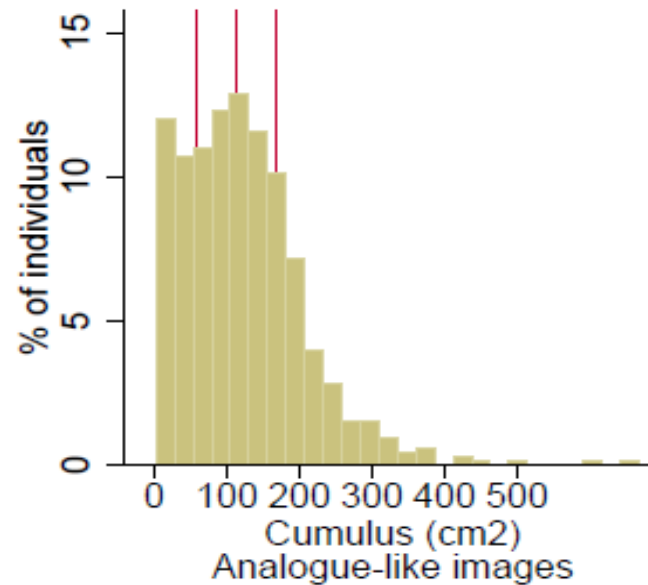

Median (IQR): 108.5 (74.7) cm<sup>2</sup>

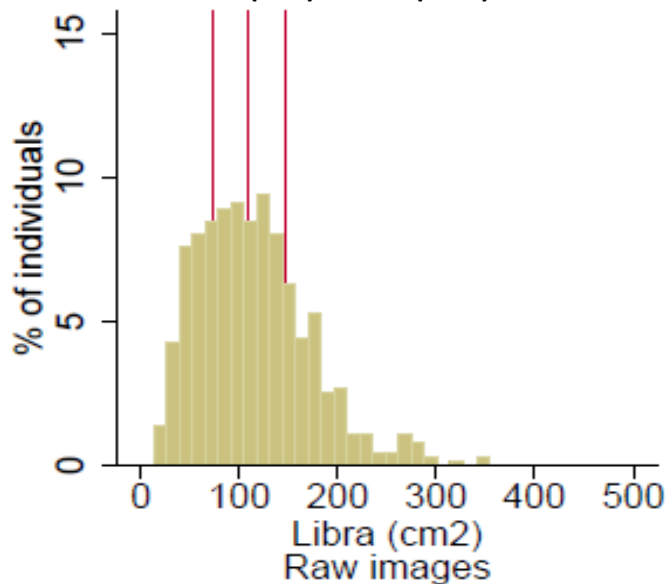

Median (IQR): 109.2 (94.3) cm<sup>2</sup>

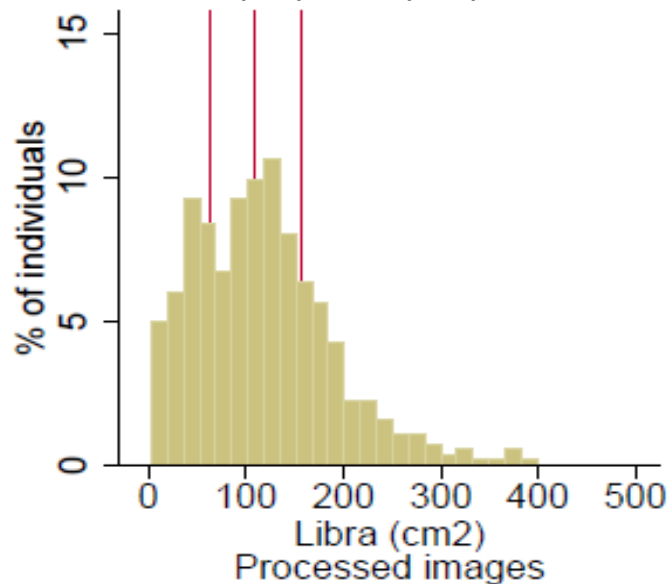

Supplement: MOESM3 [file 10749418]
