# Supplementary material for: Impact of type of full-field digital image on mammographic density assessment and breast cancer risk estimation: a case-control study
Source: Springer Nature journal article supplement (doi:10.1186/s13058-016-0756-7), 2016-09-26

Median (IQR): 144.2 (84.5) cm<sup>2</sup>

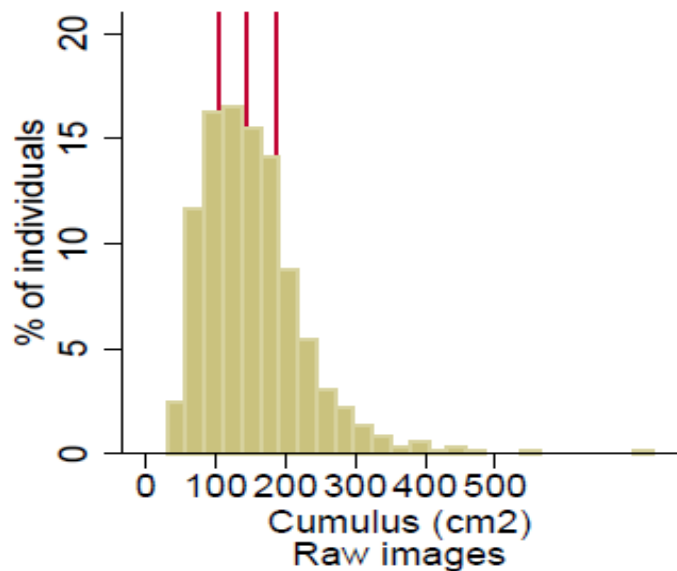

Median (IQR): 146.0 (84.9) cm<sup>2</sup>

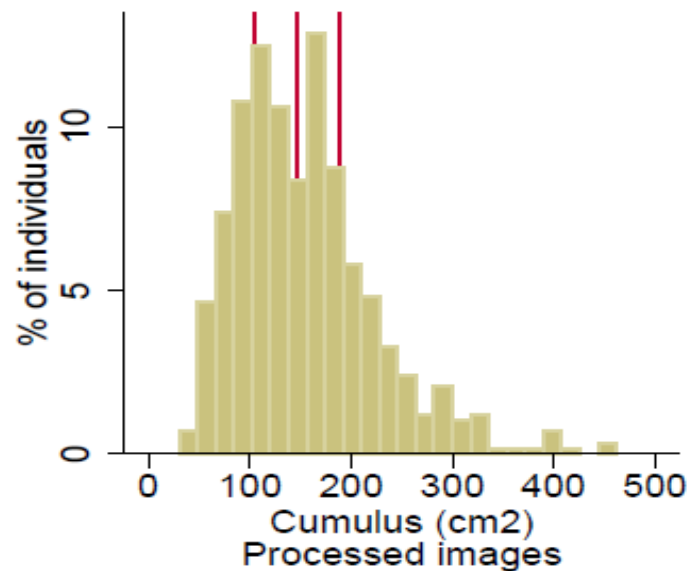

Median (IQR): 139.4 (81.9) cm<sup>2</sup>

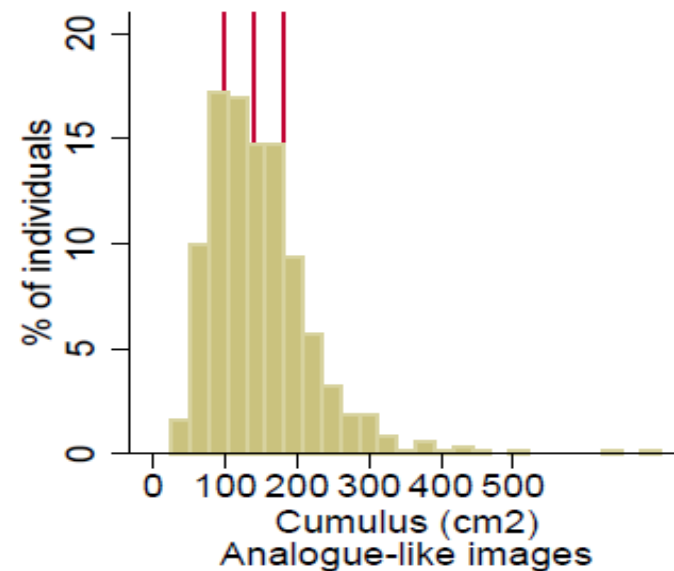

Median (IQR): 130.3 (75.9) cm<sup>2</sup>

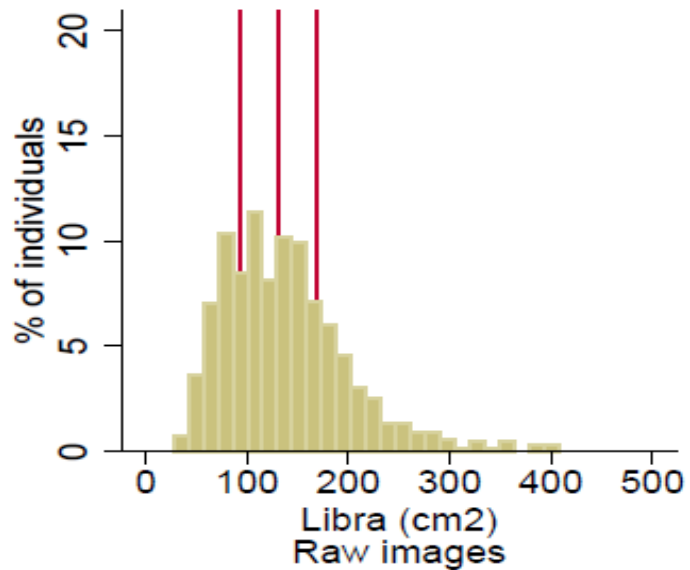

Median (IQR): 129.6 (74.9) cm<sup>2</sup>

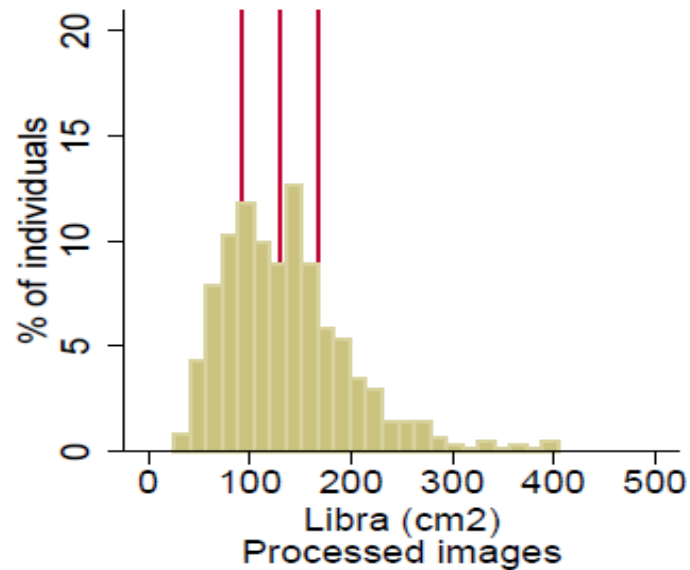

Supplement: MOESM4 [file 10749418]
