# Supplementary material for: Impact of type of full-field digital image on mammographic density assessment and breast cancer risk estimation: a case-control study
Source: Springer Nature journal article supplement (doi:10.1186/s13058-016-0756-7), 2016-09-26
Supplement: MOESM5 [file 10749418]

Cumulus raw PD values minus Cumulus processed PD values

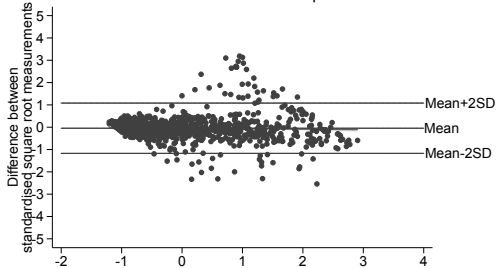

Average of two standardized square root measurements

Cumulus analogues like PD values minus Cumulus raw PD values

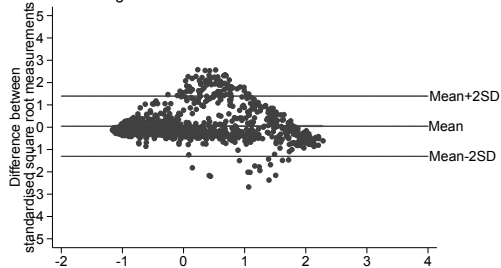

Average of two standardized square root measurements

Cumulus analogues like PD values minus Cumulus processed PD values

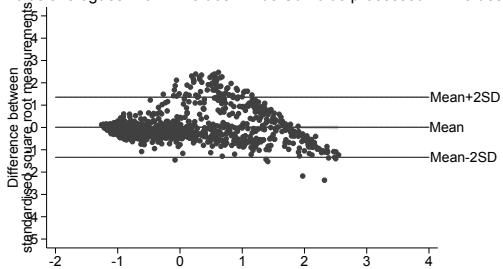

Average of two standardized square root measurements
