# Supplementary material for: Impact of type of full-field digital image on mammographic density assessment and breast cancer risk estimation: a case-control study
Source: Springer Nature journal article supplement (doi:10.1186/s13058-016-0756-7), 2016-09-26

### Dense area

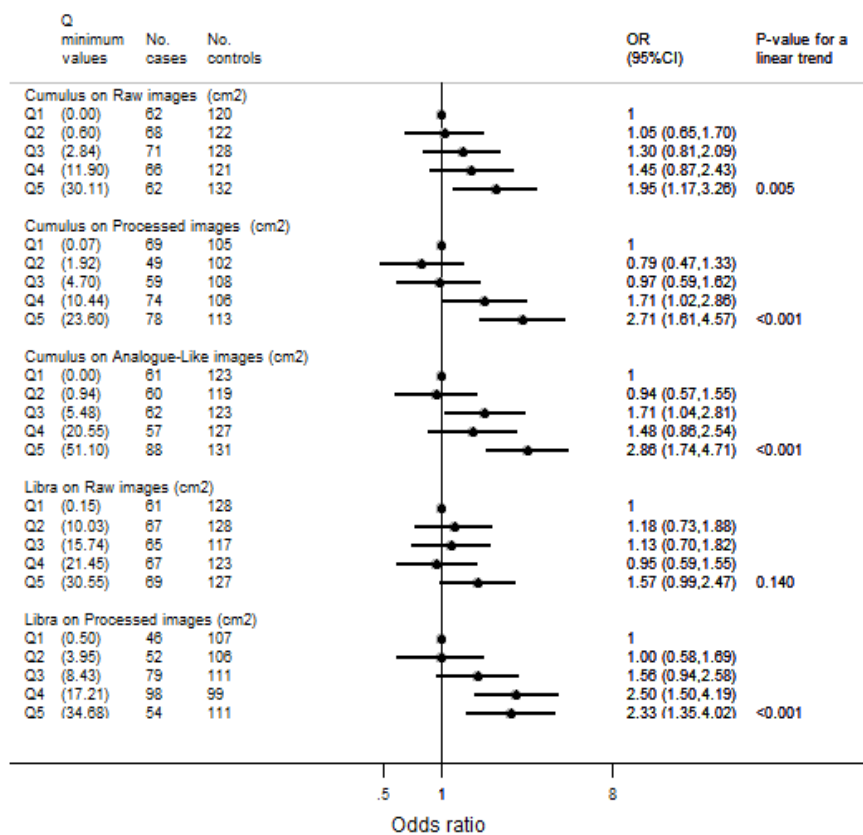

### Non-dense area

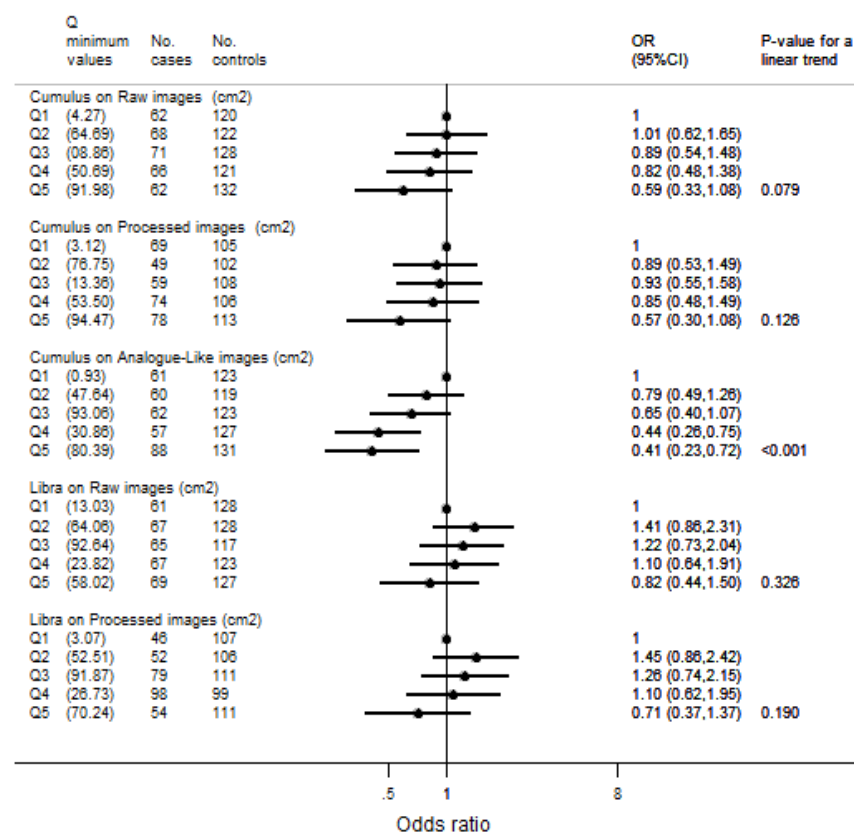

Supplement: MOESM10 [file 10749418]
